# Supplementary material for: Predicting the Willingness and Purchase of Travel Insurance During the COVID-19 Pandemic
Source: Frontiers journal article supplement (doi:10.3389/fpubh.2022.907005), 2022-07-04
Supplement: Data_Sheet_2.pdf [file Data_Sheet_2.pdf]

## Appendix 1. Survey Instrument

| Code | Items                                                                                                                             |
|------|-----------------------------------------------------------------------------------------------------------------------------------|
| IL1  | The main purpose of insurance is to reduce the financial burden of risk faced by the consumer                                     |
| IL 2 | Insurance is the best risk management tool when the chance of loss is low and the loss severity is high                           |
| IL 3 | Non-disclosure or misrepresentation of information relating to the subject matter insured may cause to reject the insurance claim |
| IL 4 | Consumers are protected against insurance company bankruptcies by state funds that pay some of the claims of bankrupt insurers    |
| HR1  | I may become sick from food and/or water and/or polluted air                                                                      |
| HR2  | There is a possibility of contracting infectious diseases                                                                         |
| HR3  | Potential health problems are a concern because of poor healthcare infrastructure                                                 |
| HR4  | Potential health problems are a concern because of poor transportation infrastructure                                             |
| HR5  | Potential health problems are a concern because of law enforcement infrastructure                                                 |
| HC1  | I consider myself as a health-conscious consumer                                                                                  |
| HC2  | I often think about health-related issues                                                                                         |
| HC3  | I am prepared to do anything that is good to health                                                                               |
| HC4  | I often dwell on my health                                                                                                        |
| HC5  | I think that I take health into account a lot in my life                                                                          |
| AT1  | I think that buying travel insurance is a good choice                                                                             |
| AT2  | I think buying travel insurance is valuable                                                                                       |
| AT3  | I think buying travel insurance is a good idea                                                                                    |
| AT4  | I think buying travel insurance should be compulsory                                                                              |
| AT5  | I think buying travel insurance is essential for everyone                                                                         |
| PR1  | I am unsure whether I can get desired protection from insurance company                                                           |
| PR2  | I am unsure whether I can get desired protection from the insurance policy                                                        |
| PR3  | I am afraid that insurance company will create unnecessary problems at the time of claim                                          |
| PR4  | I am unsure whether the hospitals in overseas accept the insurance policy                                                         |
| SN1  | My social groups think I should purchase travel insurance                                                                         |
| SN2  | People who influence my decision think that I should purchase travel insurance                                                    |
| SN3  | People whose opinions I value think that I should purchase travel insurance                                                       |
| SN4  | People who are close to me think that I should purchase travel insurance                                                          |
| SN5  | People will like it if I purchase travel insurance                                                                                |
| PB1  | I have sufficient knowledge to purchase travel insurance                                                                          |
| PB2  | I can buy travel insurance without any help from anyone                                                                           |
| PB3  | I have resourceful source about travel insurance purchasing                                                                       |
| PB4  | I can buy travel insurance reasonably well on my own                                                                              |
| PB5  | I can handle any (money, time, information related) difficulties associated with my buying decision                               |
| WTI1 | I expect to purchase travel insurance in the future                                                                               |
| WTI2 | I would like to know how a travel insurance plan works overseas                                                                   |
| WTI3 | I know the value of travel insurance and want to purchase as soon as possible                                                     |
| WTI4 | I am likely to purchase travel insurance in the future                                                                            |
| WTI5 | Given the chance, I predict I will purchase travel insurance in future                                                            |
| PTI  | Did you ever purchase travel insurance?                                                                                           |

**Note:** IL: Insurance Literacy; HR: Perceived Health Risk; HC: Health Consciousness; AT: Attitude towards Travel Insurance; PR: Perceived Product Risk; SN: Subjective Norms; PN: Perceived Behavioural Control; WTI: Willingness to Purchase Travel Insurance; INC: Average Monthly Income; PTI: Purchase Travel Insurance

## Appendix 2. Discriminant Validity

|                                           | IL    | HR    | HC    | AT    | PR     | SN    | PB    | WTI   | INC   | PTI   |
|-------------------------------------------|-------|-------|-------|-------|--------|-------|-------|-------|-------|-------|
| <i>Fornell-Larcker Criterion</i>          |       |       |       |       |        |       |       |       |       |       |
| IL                                        | 0.765 |       |       |       |        |       |       |       |       |       |
| HR                                        | 0.480 | 0.711 |       |       |        |       |       |       |       |       |
| HC                                        | 0.372 | 0.417 | 0.770 |       |        |       |       |       |       |       |
| AT                                        | 0.401 | 0.331 | 0.397 | 0.852 |        |       |       |       |       |       |
| PR                                        | 0.181 | 0.261 | 0.234 | 0.136 | 0.832  |       |       |       |       |       |
| SN                                        | 0.330 | 0.315 | 0.346 | 0.684 | 0.177  | 0.855 |       |       |       |       |
| PB                                        | 0.272 | 0.285 | 0.348 | 0.441 | 0.162  | 0.549 | 0.824 |       |       |       |
| WTI                                       | 0.383 | 0.308 | 0.420 | 0.731 | 0.157  | 0.682 | 0.523 | 0.851 |       |       |
| INC                                       | 0.084 | 0.067 | 0.096 | 0.043 | -0.006 | 0.012 | 0.144 | 0.046 | 1.000 |       |
| PTI                                       | 0.157 | 0.118 | 0.178 | 0.414 | 0.021  | 0.420 | 0.415 | 0.453 | 0.206 | 1.000 |
| <i>Heterotrait-Monotrait Ratio (HTMT)</i> |       |       |       |       |        |       |       |       |       |       |
| IL                                        | -     |       |       |       |        |       |       |       |       |       |
| HR                                        | 0.638 | -     |       |       |        |       |       |       |       |       |
| HC                                        | 0.471 | 0.525 | -     |       |        |       |       |       |       |       |
| AT                                        | 0.483 | 0.395 | 0.455 | -     |        |       |       |       |       |       |
| PR                                        | 0.231 | 0.324 | 0.276 | 0.153 | -      |       |       |       |       |       |
| SN                                        | 0.394 | 0.368 | 0.393 | 0.755 | 0.196  | -     |       |       |       |       |
| PB                                        | 0.334 | 0.342 | 0.403 | 0.491 | 0.181  | 0.609 | -     |       |       |       |
| WTI                                       | 0.464 | 0.371 | 0.487 | 0.802 | 0.180  | 0.743 | 0.571 | -     |       |       |
| INC                                       | 0.098 | 0.085 | 0.107 | 0.045 | 0.011  | 0.017 | 0.156 | 0.047 | -     |       |
| PTI                                       | 0.182 | 0.131 | 0.193 | 0.436 | 0.022  | 0.440 | 0.439 | 0.465 | 0.206 | -     |

**Note:** IL: Insurance Literacy; HR: Perceived Health Risk; HC: Health Consciousness; AT: Attitude towards Travel Insurance; PR: Perceived Product Risk; SN: Subjective Norms; PN: Perceived Behavioural Control; WTI: Willingness to Purchase Travel Insurance; INC: Average Monthly Income; PTI: Purchase Travel Insurance

### Appendix 3. Loadings and Cross-Loading

| Code | IL    | HR    | HC    | AT    | PR     | SN    | PB    | WTI   | INC    | PTI    |
|------|-------|-------|-------|-------|--------|-------|-------|-------|--------|--------|
| IL 1 | 0.813 | 0.383 | 0.297 | 0.309 | 0.135  | 0.253 | 0.180 | 0.300 | 0.062  | 0.085  |
| IL 2 | 0.821 | 0.363 | 0.267 | 0.330 | 0.128  | 0.277 | 0.215 | 0.317 | 0.048  | 0.125  |
| IL 3 | 0.713 | 0.343 | 0.269 | 0.286 | 0.160  | 0.171 | 0.186 | 0.245 | 0.120  | 0.145  |
| IL 4 | 0.706 | 0.378 | 0.306 | 0.301 | 0.134  | 0.302 | 0.250 | 0.307 | 0.030  | 0.129  |
| HR1  | 0.328 | 0.646 | 0.278 | 0.186 | 0.143  | 0.149 | 0.144 | 0.145 | 0.084  | 0.057  |
| HR2  | 0.376 | 0.643 | 0.267 | 0.208 | 0.146  | 0.149 | 0.144 | 0.170 | 0.113  | 0.037  |
| HR3  | 0.356 | 0.747 | 0.286 | 0.248 | 0.174  | 0.175 | 0.140 | 0.207 | 0.038  | 0.076  |
| HR4  | 0.334 | 0.753 | 0.320 | 0.266 | 0.189  | 0.305 | 0.287 | 0.277 | 0.014  | 0.108  |
| HR5  | 0.324 | 0.757 | 0.328 | 0.255 | 0.262  | 0.309 | 0.271 | 0.270 | 0.014  | 0.127  |
| HC1  | 0.316 | 0.316 | 0.719 | 0.274 | 0.169  | 0.246 | 0.272 | 0.301 | 0.076  | 0.139  |
| HC2  | 0.294 | 0.326 | 0.785 | 0.271 | 0.184  | 0.203 | 0.206 | 0.274 | 0.100  | 0.081  |
| HC3  | 0.253 | 0.287 | 0.783 | 0.305 | 0.112  | 0.242 | 0.250 | 0.323 | 0.046  | 0.135  |
| HC4  | 0.289 | 0.358 | 0.756 | 0.339 | 0.239  | 0.320 | 0.297 | 0.343 | 0.065  | 0.133  |
| HC5  | 0.283 | 0.314 | 0.802 | 0.327 | 0.187  | 0.303 | 0.301 | 0.362 | 0.087  | 0.187  |
| AT1  | 0.355 | 0.287 | 0.331 | 0.860 | 0.094  | 0.551 | 0.334 | 0.625 | 0.051  | 0.359  |
| AT2  | 0.361 | 0.291 | 0.356 | 0.884 | 0.097  | 0.560 | 0.357 | 0.623 | 0.069  | 0.350  |
| AT3  | 0.353 | 0.286 | 0.350 | 0.871 | 0.124  | 0.572 | 0.359 | 0.647 | 0.030  | 0.337  |
| AT4  | 0.303 | 0.254 | 0.300 | 0.812 | 0.117  | 0.626 | 0.426 | 0.613 | 0.001  | 0.363  |
| AT5  | 0.336 | 0.290 | 0.353 | 0.832 | 0.150  | 0.612 | 0.405 | 0.608 | 0.031  | 0.357  |
| PR1  | 0.139 | 0.197 | 0.194 | 0.127 | 0.883  | 0.176 | 0.167 | 0.163 | -0.007 | 0.041  |
| PR2  | 0.152 | 0.250 | 0.213 | 0.129 | 0.898  | 0.168 | 0.177 | 0.135 | -0.007 | 0.006  |
| PR3  | 0.163 | 0.204 | 0.167 | 0.108 | 0.775  | 0.132 | 0.112 | 0.099 | 0.009  | 0.016  |
| PR4  | 0.162 | 0.228 | 0.205 | 0.084 | 0.765  | 0.099 | 0.063 | 0.113 | -0.013 | -0.003 |
| SN1  | 0.280 | 0.247 | 0.291 | 0.571 | 0.162  | 0.844 | 0.446 | 0.552 | -0.010 | 0.353  |
| SN2  | 0.321 | 0.297 | 0.317 | 0.603 | 0.156  | 0.864 | 0.473 | 0.606 | 0.028  | 0.377  |
| SN3  | 0.304 | 0.273 | 0.303 | 0.611 | 0.139  | 0.862 | 0.442 | 0.626 | 0.007  | 0.384  |
| SN4  | 0.256 | 0.276 | 0.289 | 0.570 | 0.146  | 0.850 | 0.487 | 0.554 | 0.020  | 0.336  |
| SN5  | 0.243 | 0.251 | 0.277 | 0.566 | 0.152  | 0.856 | 0.501 | 0.571 | 0.006  | 0.342  |
| PB1  | 0.221 | 0.222 | 0.324 | 0.419 | 0.148  | 0.524 | 0.819 | 0.476 | 0.092  | 0.348  |
| PB2  | 0.220 | 0.252 | 0.262 | 0.345 | 0.128  | 0.449 | 0.857 | 0.393 | 0.154  | 0.349  |
| PB3  | 0.227 | 0.238 | 0.279 | 0.398 | 0.116  | 0.505 | 0.867 | 0.458 | 0.115  | 0.385  |
| PB4  | 0.210 | 0.228 | 0.264 | 0.340 | 0.115  | 0.427 | 0.849 | 0.425 | 0.104  | 0.376  |
| PB5  | 0.244 | 0.238 | 0.299 | 0.296 | 0.161  | 0.333 | 0.719 | 0.387 | 0.136  | 0.238  |
| WTI1 | 0.319 | 0.252 | 0.365 | 0.669 | 0.134  | 0.625 | 0.495 | 0.882 | 0.058  | 0.429  |
| WTI2 | 0.304 | 0.286 | 0.357 | 0.465 | 0.170  | 0.414 | 0.250 | 0.705 | -0.004 | 0.200  |
| WTI3 | 0.342 | 0.279 | 0.353 | 0.616 | 0.116  | 0.614 | 0.541 | 0.835 | 0.071  | 0.414  |
| WTI4 | 0.331 | 0.265 | 0.372 | 0.673 | 0.122  | 0.603 | 0.443 | 0.909 | 0.039  | 0.420  |
| WTI5 | 0.340 | 0.249 | 0.354 | 0.657 | 0.148  | 0.608 | 0.441 | 0.905 | 0.019  | 0.412  |
| INC  | 0.084 | 0.067 | 0.096 | 0.043 | -0.006 | 0.012 | 0.144 | 0.046 | 1.000  | 0.206  |
| PTI  | 0.157 | 0.118 | 0.178 | 0.414 | 0.021  | 0.420 | 0.415 | 0.453 | 0.206  | 1.000  |

**Note:** (1) IL: Insurance Literacy; HR: Perceived Health Risk; HC: Health Consciousness; AT: Attitude towards Travel Insurance; PR: Perceived Product Risk; SN: Subjective Norms; PN: Perceived Behavioural Control; WTI: Willingness to Purchase Travel Insurance; INC: Average Monthly Income; PTI: Purchase Travel Insurance; (2) The Italic values in the matrix above are the item loadings and others are cross-loadings
